# Supplementary material for: Formation of specific dipolar microenvironments complementary to dipolar betaine dye by nonionic peptide lipids in nonpolar medium
Source: Royal Society of Chemistry journal article supplement (doi:10.1039/b818218c), 2009-01-01
Supplement: b818218c-a.pdf [file b818218c-a.pdf]

## Electronic Supplementary Informations

### Formation of specific dipolar microenvironments complementary to dipolar betaine dye by nonionic peptide lipids in nonpolar medium

#### Preparation of peptide lipids

*N',N''*-Didodecyl-*N*<sup>α</sup>-[(*N'''*-benzyloxycarbonyl)glycinoyl]-L-glutamide (**1**). *N',N''*-Didodecyl-L-glutamide<sup>1</sup> (1.64 g, 3.40 mmol), Gly-Z (0.853 g, 4.08 mmol), and triethylamine (0.827 g, 8.17 mmol) were dissolved in 100 cm<sup>3</sup> of tetrahydrofuran (THF) and stirred with cooling to 0 °C. To the solution was added diethylphosphoryl cyanidate (DEPC) (0.605 g, 5.10 mmol) and stirred in an ice bath for 30 min. After being stirred for 1 day at room temperature, the solution was concentrated *in vacuo*. The residue was dissolved in 200 cm<sup>3</sup> of chloroform and was washed with 0.3 N HCl (200 cm<sup>3</sup>, in twice), deionized water (20 cm<sup>3</sup>, once), 5 wt% aqueous NaHCO<sub>3</sub> (200 cm<sup>3</sup>, in twice), and deionized water (20 cm<sup>3</sup>, once). The solution was dried over Na<sub>2</sub>SO<sub>4</sub>. After filtration, the filtrate was concentrated *in vacuo* and recrystallized from methanol to give white solid (**1**): yield 1.59 g (67.7 %); m.p. 147 °C; FT-IR (KBr): /cm<sup>-1</sup> 3291, 2921, 2851, 1697, 1643 and 1556; <sup>1</sup>H-NMR (CDCl<sub>3</sub>): δ 0.85-0.90 (t, 6H, CH<sub>3</sub> × 2), 1.14-1.37 (m, 36H, CH<sub>3</sub>(CH<sub>2</sub>)<sub>9</sub> × 2), 1.38-1.48 (m, 4H, CH<sub>3</sub>(CH<sub>2</sub>)<sub>9</sub>CH<sub>2</sub> × 2), 1.92-2.12 (m, 2H, \*CHCH<sub>2</sub>), 2.29-2.32 (m, 2H, \*CHCH<sub>2</sub>CH<sub>2</sub>), 3.15-3.20 (m, 4H, CH<sub>3</sub>(CH<sub>2</sub>)<sub>10</sub>CH<sub>2</sub> × 2), 3.85-3.93 (m, 2H, C(=O)CH<sub>2</sub>NH), 4.36-4.42 (m, 1H, \*CH), 5.18-5.14 (s, 2H, CH<sub>2</sub>C<sub>6</sub>H<sub>5</sub>), 5.79-5.89 (t, 1H, NH), 6.25-6.34 (t, 1H, NH), 6.73-7.14 (t, 1H, NH), 7.29-7.34 (s, 5H, C<sub>6</sub>H<sub>5</sub>), 7.74-7.82 (d, 1H, NH); (Found: C, 67.80; H, 10.08; N, 7.93. Calc. for C<sub>39</sub>H<sub>68</sub>N<sub>4</sub>O<sub>5</sub>·1.0H<sub>2</sub>O: C, 67.80; H, 10.21; N, 8.11 %). The related compounds were synthesized as described above using L-Ala-Z for **2**, L-Val-Z for **3**, L-Leu-Z for **4**, L-Ile-Z for **5**, L-Phe-Z for **6**, and Sar-Z for **7** instead of Gly-Z, respectively: *N',N''*-Didodecyl-*N*<sup>α</sup>-[(*N'''*-benzyloxycarbonyl)-L-alanoyl]-L-glutamide (**2**), yield 0.687 g (61.0 %); m.p. 164-168 °C; FT-IR (KBr): /cm<sup>-1</sup> 3287, 2917, 2850, 1699, 1639

and 1534;  $^1\text{H-NMR}$  ( $\text{CDCl}_3$ ):  $\delta$  0.77-0.96 (t, 6H,  $\text{CH}_3 \times 2$ ), 1.11-1.36 (m, 36H,  $\text{CH}_3(\text{CH}_2)_9 \times 2$ ), 1.36-1.41 (d, 3H,  $^*\text{CHCH}_3$ ), 1.46-1.58 (m, 4H,  $\text{CH}_3(\text{CH}_2)_9\text{CH}_2 \times 2$ ), 1.93-2.16 (m, 2H,  $^*\text{CHCH}_2$ ), 2.18-2.40 (m, 2H,  $^*\text{CHCH}_2\text{CH}_2$ ), 3.04-3.30 (m, 4H,  $\text{CH}_2\text{NH} \times 2$ ), 4.14-4.27 (m, 1H,  $^*\text{CH}$ ), 4.32-4.43 (m, 1H,  $^*\text{CH}$ ), 5.02-5.19 (m, 2H,  $\text{CH}_2\text{C}_6\text{H}_5$ ), 5.58-5.66 (d, 1H,  $\text{NH}$ ), 6.13-6.27 (t, 1H,  $\text{NH}$ ), 6.94-7.07 (t, 1H,  $\text{NH}$ ), 7.28-7.39 (s, 5H,  $\text{C}_6\text{H}_5$ ), 7.82-7.94 (d, 1H,  $\text{NH}$ ); (Found: C, 69.16; H, 10.44; N, 8.03. Calc. for  $\text{C}_{40}\text{H}_{70}\text{N}_4\text{O}_5 \cdot 0.4\text{H}_2\text{O}$ : C, 69.16; H, 10.28; N, 8.07 %). *N',N''*-Didodecyl- $N^\alpha$ -[( $N'''$ -benzyloxycarbonyl)-L-valinoyl]-L-glutamide (**3**), yield 0.720 g (61.7 %); m.p. 201-203 °C; FT-IR (KBr):  $/\text{cm}^{-1}$  3290, 2922, 2852, 1692, 1638 and 1543;  $^1\text{H-NMR}$  ( $\text{CDCl}_3$ ):  $\delta$  0.75-1.02 (m, 12H,  $\text{CH}_3 \times 4$ ), 1.02-1.39 (m, 36H,  $\text{CH}_3(\text{CH}_2)_9 \times 2$ ), 1.39-1.59 (m, 4H,  $\text{CH}_3(\text{CH}_2)_9\text{CH}_2 \times 2$ ), 1.60-1.84 (m, 1H,  $^*\text{CHCH}$ ), 1.93-2.16 (m, 2H,  $^*\text{CHCH}_2$ ), 2.23-2.40 (m, 2H,  $^*\text{CHCH}_2\text{CH}_2$ ), 3.04-3.30 (m, 4H,  $\text{CH}_2\text{NH} \times 2$ ), 3.82-4.00 (t, 1H,  $^*\text{CH}$ ), 4.32-4.43 (m, 1H,  $^*\text{CH}$ ), 5.02-5.19 (s, 2H,  $\text{CH}_2\text{C}_6\text{H}_5$ ), 5.58-5.66 (d, 1H,  $\text{NH}$ ), 6.13-6.27 (t, 1H,  $\text{NH}$ ), 6.94-7.07 (t, 1H,  $\text{NH}$ ), 7.28-7.39 (s, 5H,  $\text{C}_6\text{H}_5$ ), 7.82-7.93 (d, 1H,  $\text{NH}$ ); (Found: C, 70.16; H, 10.66; N, 7.85. Calc. for  $\text{C}_{42}\text{H}_{74}\text{N}_4\text{O}_5 \cdot 0.2\text{H}_2\text{O}$ : C, 70.16; H, 10.44; N, 7.79 %). *N',N''*-Didodecyl- $N^\alpha$ -[( $N'''$ -benzyloxycarbonyl)-L-leucinoyl]-L-glutamide (**4**), yield 0.452 g (90.4 %); m.p. 202-205 °C; FT-IR (KBr):  $/\text{cm}^{-1}$  3293, 2923, 2852, 1693, 1638 and 1542;  $^1\text{H-NMR}$  ( $\text{CDCl}_3$ ):  $\delta$  0.76-1.01 (t, 6H,  $\text{CH}_3 \times 4$ ), 1.07-1.38 (m, 37H,  $\text{CH}_3(\text{CH}_2)_9 \times 2$ ,  $\text{CH}(\text{CH}_3)_2$ ), 1.39-1.57 (m, 4H,  $\text{CH}_3(\text{CH}_2)_9\text{CH}_2 \times 2$ ), 1.58-1.81 (m, 2H,  $\text{CH}_2\text{CH}$ ), 1.91-2.17 (m, 2H,  $^*\text{CHCH}_2\text{CH}_2$ ), 2.17-2.40 (m, 2H,  $^*\text{CHCH}_2\text{CH}_2$ ), 2.99-3.30 (m, 4H,  $\text{CH}_2\text{NH} \times 2$ ), 4.09-4.22 (m, 1H,  $^*\text{CH}$ ), 4.29-4.42 (m, 1H,  $^*\text{CH}$ ), 5.01-5.18 (s, 2H,  $\text{CH}_2\text{C}_6\text{H}_5$ ), 5.41-5.54 (d, 1H,  $\text{NH}$ ), 6.10-6.24 (t, 1H,  $\text{NH}$ ), 6.90-7.07 (t, 1H,  $\text{NH}$ ), 7.28-7.42 (s, 5H,  $\text{C}_6\text{H}_5$ ), 7.68-7.87 (d, 1H,  $\text{NH}$ ); (Found: C, 69.29; H, 10.70; N, 7.79. Calc. for  $\text{C}_{43}\text{H}_{76}\text{N}_4\text{O}_5 \cdot 3.8\text{H}_2\text{O}$ : C, 64.72; H, 10.57; N, 7.02 %). *N',N''*-Didodecyl- $N^\alpha$ -[( $N'''$ -benzyloxycarbonyl)-L-isoleucinoyl]-L-glutamide (**5**), yield 0.33 g (66 %); m.p. 202-205 °C; FT-IR (KBr):  $/\text{cm}^{-1}$  3327, 2921, 2850, 1692, 1637 and 1533;  $^1\text{H-NMR}$  ( $\text{CDCl}_3$ ):  $\delta$  0.77-0.99 (t, 12H,  $\text{CH}_3 \times 4$ ), 1.10-1.40 (m, 38H,  $\text{CH}_3(\text{CH}_2)_9 \times 2$ ,  $\text{CHCH}_2$ ), 1.40-1.61 (m, 4H,  $\text{CH}_3(\text{CH}_2)_9\text{CH}_2 \times 2$ ), 1.64-1.79 (m, 1H,  $^*\text{CHCH}$ ), 1.91-2.11

(m, 2H, \*CHCH<sub>2</sub>), 2.14-2.41 (m, 2H, \*CHCH<sub>2</sub>CH<sub>2</sub>), 2.94-3.30 (m, 4H, CH<sub>2</sub>NH × 2), 3.93-4.07 (m, 1H, \*CH), 4.26-4.48 (m, 1H, \*CH), 4.98-5.14 (s, 2H, CH<sub>2</sub>C<sub>6</sub>H<sub>5</sub>), 5.33-5.48 (m, 1H, NH), 5.90-6.04 (m, 1H, NH), 6.68-6.78 (m, 1H, NH), 7.27-7.39 (m, 5H, C<sub>6</sub>H<sub>5</sub>), 7.72-7.87 (m, 1H, NH); (Found: C, 69.71; H, 10.79; N, 7.59. Calc. for C<sub>43</sub>H<sub>76</sub>N<sub>4</sub>O<sub>5</sub>·0.7H<sub>2</sub>O: C, 69.71; H, 10.52; N, 7.56 %). *N',N''*-Didodecyl-*N*<sup>α</sup>-[(*N'''*)-benzyloxycarbonyl]-L-phenylalanyl]-L-glutamide (**6**), yield 0.177 g (88.5 %); m.p. 168-172 °C; FT-IR (KBr): /cm<sup>-1</sup> 3292, 2921, 2851, 1694, 1639 and 1539; <sup>1</sup>H-NMR (CDCl<sub>3</sub>): δ 0.81-0.96 (t, 6H, CH<sub>3</sub> × 2), 1.10-1.38 (m, 36H, CH<sub>3</sub>(CH<sub>2</sub>)<sub>9</sub> × 2), 1.39-1.59 (m, 4H, CH<sub>3</sub>(CH<sub>2</sub>)<sub>9</sub>CH<sub>2</sub> × 2), 1.91-2.11 (m, 2H, \*CHCH<sub>2</sub>CH<sub>2</sub>), 2.12-2.40 (m, 2H, \*CHCH<sub>2</sub>CH<sub>2</sub>), 2.94-3.08 (m, 2H, \*CHCH<sub>2</sub>C<sub>6</sub>H<sub>5</sub>), 3.08-3.28 (m, 4H, CH<sub>2</sub>NH × 2), 4.26-4.37 (m, 1H, \*CHCH<sub>2</sub>CH<sub>2</sub>), 4.37-4.48 (m, 1H, \*CHCH<sub>2</sub>C<sub>6</sub>H<sub>5</sub>), 5.00-5.12 (s, 2H, C(=O)OCH<sub>2</sub>C<sub>6</sub>H<sub>5</sub>), 5.34-5.44 (d, 1H, NH), 5.89-6.02 (t, 1H, NH), 6.65-6.80 (t, 1H, NH), 7.01-7.42 (m, 10H, C<sub>6</sub>H<sub>5</sub> × 2), 7.59-7.72 (d, 1H, NH); (Found: C, 71.28; H, 9.72; N, 7.17. Calc. for C<sub>46</sub>H<sub>74</sub>N<sub>4</sub>O<sub>5</sub>·0.7H<sub>2</sub>O: C, 71.28; H, 9.80; N, 7.23 %). *N',N''*-Didodecyl-*N*<sup>α</sup>-[(*N'''*)-benzyloxycarbonyl-*N'''*-methylglycinoyl]-L-glutamide (**7**), yield 0.476 g (95.2 %); m.p. 153-160 °C; FT-IR (KBr): /cm<sup>-1</sup> 3292, 2922, 2851, 1683, 1642 and 1543; <sup>1</sup>H-NMR (CDCl<sub>3</sub>): δ 0.78-0.96 (t, 6H, CH<sub>3</sub> × 2), 1.16-1.41 (m, 36H, CH<sub>3</sub>(CH<sub>2</sub>)<sub>9</sub> × 2), 1.43-1.58 (m, 4H, CH<sub>3</sub>(CH<sub>2</sub>)<sub>9</sub>CH<sub>2</sub> × 2), 1.93-2.12 (m, 2H, \*CHCH<sub>2</sub>), 2.24-2.42 (m, 2H, \*CHCH<sub>2</sub>CH<sub>2</sub>), 2.99-3.11 (s, 3H, CH<sub>3</sub>N), 3.13-3.31 (m, 4H, CH<sub>2</sub>NH × 2), 3.68-4.00 (m, 2H, C(=O)CH<sub>2</sub>N), 4.30-4.46 (m, 1H, \*CH), 5.09-5.20 (s, 2H, CH<sub>2</sub>C<sub>6</sub>H<sub>5</sub>), 6.01-6.17 (t, 1H, NH), 6.93-7.12 (t, 1H, NH), 7.27-7.44 (m, 5H, C<sub>6</sub>H<sub>5</sub>), 7.72-7.83 (d, 1H, NH); (Found: C, 69.41; H, 8.07; N, 7.17. Calc. for C<sub>43</sub>H<sub>76</sub>N<sub>4</sub>O<sub>5</sub>·0.3H<sub>2</sub>O: C, 69.41; H, 10.28; N, 8.09 %).

***N',N''*-Didodecyl-*N*<sup>α</sup>-[(*N'''*)-[(*N''''*)-benzyloxycarbonyl]glycinoyl]-3-aminopropanoyl]-L-glutamide (**8**).** *N',N''*-Didodecyl-*N*<sup>α</sup>-(3-aminopropanoyl)-L-glutamide<sup>1a</sup> (0.878 g, 1.59 mmol), Gly-Z (0.413 g, 1.91 mmol), and triethylamine (0.483 g, 4.76 mmol) were dissolved in 100 cm<sup>3</sup> of THF and stirred with cooling to 0 °C. To the solution was added DEPC (0.419 g, 2.54 mmol) and stirred in an ice bath for 30 min. After

being stirred for 1 day at room temperature, the solution was concentrated *in vacuo*. The residue was dissolved in 200 cm<sup>3</sup> of chloroform and was washed with 0.3 N HCl (200 cm<sup>3</sup>, in twice), deionized water (20 cm<sup>3</sup>, once), 5 wt% aqueous NaHCO<sub>3</sub> (200 cm<sup>3</sup>, in twice), and deionized water (20 cm<sup>3</sup>, once). The solution was dried over Na<sub>2</sub>SO<sub>4</sub>. After filtration, the filtrate was concentrated *in vacuo* and recrystallized from methanol to give yellow solid (**8**): yield 0.838 g (71 %); m.p. 99-100 °C; FT-IR (KBr): /cm<sup>-1</sup> 3296, 2922, 2854, 1717, 1636 and 1560; <sup>1</sup>H-NMR (CDCl<sub>3</sub>): δ 0.79-0.98 (t, 6H, CH<sub>3</sub> × 2), 0.98-1.39 (m, 36H, CH<sub>3</sub>(CH<sub>2</sub>)<sub>9</sub> × 2), 1.39-1.59 (m, 4H, CH<sub>3</sub>(CH<sub>2</sub>)<sub>9</sub>CH<sub>2</sub> × 2), 1.83-2.16 (m, 2H, \*CHCH<sub>2</sub>), 2.16-2.55 (m, 2H, C(=O)CH<sub>2</sub> × 2), 3.09-3.39 (m, 4H, CH<sub>3</sub>(CH<sub>2</sub>)<sub>10</sub>CH<sub>2</sub> × 2), 3.39-3.78 (m, 2H, C(=O)CH<sub>2</sub>CH<sub>2</sub>NH), 3.93-4.22 (m, 2H, C(=O)CH<sub>2</sub>NH), 4.22-4.43 (m, 1H, \*CH), 5.04-5.17 (s, 2H, CH<sub>2</sub>C<sub>6</sub>H<sub>5</sub>), 5.77-5.92 (d, 1H, NH), 6.17-6.49 (m, 1H, NH), 6.88-7.14 (m, 1H, NH), 7.29-7.50 (m, 5H, C<sub>6</sub>H<sub>5</sub>); (Found: C, 66.75; H, 9.89; N, 8.14. Calc. for C<sub>42</sub>H<sub>73</sub>N<sub>5</sub>O<sub>6</sub>·0.6H<sub>2</sub>O: C, 66.75; H, 9.91; N, 9.27 %). The related compound *N',N''*-didodecyl-*N*<sup>α</sup>-[*N''*'-(*N''''*'-benzyloxycarbonyl-*N''''*'-methylglycinoyl)-3-aminopropanoyl]-L-glutamide (**9**) was synthesized as described above using Sar-Z instead of Gly-Z to give yellow solid: yield 0.48 g (39 %); m.p. 99-105 °C; FT-IR (KBr): /cm<sup>-1</sup> 3298, 2922, 2854, 1711, 1660, 1638 and 1555; <sup>1</sup>H-NMR (CDCl<sub>3</sub>): δ 0.77-0.98 (t, 6H, CH<sub>3</sub> × 2), 0.98-1.39 (m, 36H, CH<sub>3</sub>(CH<sub>2</sub>)<sub>9</sub> × 2), 1.39-1.60 (m, 4H, CH<sub>3</sub>(CH<sub>2</sub>)<sub>9</sub>CH<sub>2</sub> × 2), 1.76-2.00 (m, 2H, \*CHCH<sub>2</sub>), 2.00-2.15 (m, 2H, \*CHCH<sub>2</sub>CH<sub>2</sub>), 2.22-2.57 (m, 2H, C(=O)CH<sub>2</sub>CH<sub>2</sub>NH), 2.95-3.09 (s, 3H, NCH<sub>3</sub>), 3.09-3.29 (m, 4H, CH<sub>3</sub>(CH<sub>2</sub>)<sub>10</sub>CH<sub>2</sub> × 2), 3.45-3.80 (m, 2H, C(=O)CH<sub>2</sub>CH<sub>2</sub>NH), 3.94-4.26 (m, 2H, C(=O)CH<sub>2</sub>N), 4.26-4.42 (m, 1H, \*CH), 5.05-5.20 (m, 2H, CH<sub>2</sub>C<sub>6</sub>H<sub>5</sub>), 6.04-6.16 (s, 1H, NH), 6.20-6.34 (s, 1H, NH), 6.42-6.95 (m, 1H, NH), 7.06-7.21 (m, 1H, NH), 7.28-7.43 (m, 5H, C<sub>6</sub>H<sub>5</sub>); (Found: C, 67.96; H, 10.17; N, 8.33. Calc. for C<sub>43</sub>H<sub>75</sub>N<sub>5</sub>O<sub>6</sub>·0.5H<sub>2</sub>O: C, 67.96; H, 9.98; N, 9.22 %).

***N',N''*-Didodecyl-*N*<sup>α</sup>-[3-(benzyloxycarbonyl)propanoyl]-L-glutamide (**10**).** *N',N''*-Didodecyl-*N*<sup>α</sup>-[(3-carboxy)propanoyl]-L-glutamide<sup>1c</sup> (0.601 g, 1.03 mmol), benzyl alcohol (0.168 g, 1.55 mmol), and triethylamine (0.209 g, 2.07 mmol) were dissolved in 100 cm<sup>3</sup> of

chloroform and stirred with cooling to 0 °C. To the solution was added DEPC (0.236 g, 1.45 mmol) and stirred in an ice bath for 30 min. After being stirred for 1 day at room temperature, the solution was washed with 0.3 N HCl (200 cm<sup>3</sup>, in twice), deionized water (20 cm<sup>3</sup>, once), 5 wt% aqueous NaHCO<sub>3</sub> (200 cm<sup>3</sup>, in twice), and deionized water (20 cm<sup>3</sup>, once). The solution was dried over Na<sub>2</sub>SO<sub>4</sub>. After filtration, the filtrate was concentrated *in vacuo* and recrystallized from methanol to give white solid (**10**): yield 0.368 g (53.0 %); m.p. 72-78 °C; FT-IR (KBr): /cm<sup>-1</sup> 3298, 2928, 2854, 1713, 1642 and 1543; <sup>1</sup>H-NMR (CDCl<sub>3</sub>): δ 0.70-1.05 (t, 6H, CH<sub>3</sub> × 2), 1.05-1.81 (m, 40H, CH<sub>3</sub>(CH<sub>2</sub>)<sub>10</sub> × 2), 1.87-2.62 (m, 8H, \*CH(CH<sub>2</sub>)<sub>2</sub>, C(=O)(CH<sub>2</sub>)<sub>2</sub>C(=O)), 2.92-3.50 (m, 4H, CH<sub>2</sub>NH × 2), 4.47-4.79 (m, 1H, \*CH), 4.96-5.24 (s, 2H, CH<sub>2</sub>C<sub>6</sub>H<sub>5</sub>), 5.84 (m, 1H, NH), 6.71-7.63 (m, 7H, C<sub>6</sub>H<sub>5</sub>, NH × 2); (Found: C, 68.76; H, 10.61; N, 6.79. Calc. for C<sub>40</sub>H<sub>69</sub>N<sub>3</sub>O<sub>5</sub>·1.5H<sub>2</sub>O: C, 68.76; H, 10.38; N, 6.01 %).

***N',N''*-Didodecyl-*N*<sup>α</sup>-[3-(*N'''*-benzyloxycarbonyl)aminopropanoyl]-L-glutamide (**11**)**. L-**11** was prepared as reported previously<sup>1a</sup> to give white solid: yield 3.83 g (88 %); m.p. 167-170 °C; FT-IR (KBr): /cm<sup>-1</sup> 3300, 2922, 2854, 1696, 1638 and 1555; <sup>1</sup>H-NMR (CDCl<sub>3</sub>): δ 0.70-1.08 (t, 6H, CH<sub>3</sub> × 2), 1.08-1.80 (m, 40H, CH<sub>3</sub>(CH<sub>2</sub>)<sub>10</sub> × 2), 1.80-2.19 (m, 2H, \*CHCH<sub>2</sub>), 2.19-2.70 (m, 4H, C(=O)CH<sub>2</sub> × 2), 3.01-3.39 (m, 4H, CH<sub>3</sub>(CH<sub>2</sub>)<sub>10</sub>CH<sub>2</sub> × 2), 3.39-3.69 (m, 2H, CH<sub>2</sub>NHC(=O)O), 4.00-4.50 (m, 1H, \*CH), 4.96-5.22 (s, 2H, CH<sub>2</sub>C<sub>6</sub>H<sub>5</sub>), 5.47 (br t, 1H, NH), 5.99 (br t, 1H, NH), 6.88 (br t, 1H, NH), 7.32 (m, 5H, C<sub>6</sub>H<sub>5</sub>); (Found: C, 68.00; H, 10.08; N, 7.93. Calc. for C<sub>40</sub>H<sub>70</sub>N<sub>4</sub>O<sub>5</sub>: C, 68.00; H, 10.30; N, 7.93 %). The corresponding racemate (DL-**11**) was similarly prepared to give white solid: yield 3.00 g (72 %); m.p. 87-107 °C; FT-IR (KBr): /cm<sup>-1</sup> 3300, 2924, 2856, 1698, 1638 and 1560; <sup>1</sup>H-NMR (CDCl<sub>3</sub>): δ 0.69-1.03 (t, 6H, CH<sub>3</sub> × 2), 1.03-1.70 (m, 40H, CH<sub>3</sub>(CH<sub>2</sub>)<sub>10</sub> × 2), 1.70-2.71 (m, 6H, \*CH(CH<sub>2</sub>)<sub>2</sub>, C(=O)CH<sub>2</sub>CH<sub>2</sub>NH), 2.71-3.70 (m, 6H, CH<sub>2</sub>NH × 3), 4.21-4.62 (m, 1H, \*CH), 4.62-5.40 (s, 2H, CH<sub>2</sub>C<sub>6</sub>H<sub>5</sub>), 5.36-5.83 (m, 1H, NH), 5.78 (br s, 1H, NH), 6.64 (br s, 1H, NH), 7.33 (s, 5H, C<sub>6</sub>H<sub>5</sub>), 8.22 (br s, 1H, NH); (Found: C, 69.78; H, 10.35; N, 8.20. Calc. for C<sub>40</sub>H<sub>70</sub>N<sub>4</sub>O<sub>5</sub>: C, 69.93; H, 10.27; N, 8.16 %).

***N',N''-Didodecyl-N<sup>α</sup>-[4-(N''''-benzyloxycarbonyl)aminobutanoyl]-L-glutamide***

**(12).**  $\gamma$ -Aminobutanoic acid (GABA) (5.00 g, 48.5 mmol) and sodium hydroxide (5.82 g, 145 mmol) were dissolved in 80 cm<sup>3</sup> of deionized water with cooling in an ice bath. Benzyl chloroformate (Z-Cl) (12.42 g, 72.8 mmol) was added dropwise to the solution and the solution was stirred vigorously for 2 hours in an ice bath. The solution was washed with 50 cm<sup>3</sup> of diethylether to remove excess Z-Cl. The pH of aqueous layer was lowered to 2 to give turbid solution. The solution was stored in refrigerator. The solid was filtered and collected to obtain white powder,  $\gamma$ -(*N*-benzyloxycarbonyl)aminobutanoic acid (GABA-Z) **(17)**: yield 10.05 g (87.4 %); m.p. 64-65 °C; FT-IR (KBr): /cm<sup>-1</sup> 3334, 3064, 2964, 2924, 1690, 1549, 1454, 1274, 723 and 698; <sup>1</sup>H-NMR (CDCl<sub>3</sub>):  $\delta$  1.75-1.89 (m, 2H, C(=O)CH<sub>2</sub>CH<sub>2</sub>), 2.32-2.45 (t, 2H, C(=O)CH<sub>2</sub>), 3.16-3.30 (q, 2H, CH<sub>2</sub>NH), 4.91-5.04 (s, 1H, NH), 5.04-5.18 (m, 2H, CH<sub>2</sub>C<sub>6</sub>H<sub>5</sub>), 7.28-7.41 (m, 5H, C<sub>6</sub>H<sub>5</sub>), 9.90 (br, 1H, OH). *N',N''*-Didodecyl-L-glutamide<sup>4</sup> (2.83 g, 5.88 mmol), **17** (2.09 g, 8.82 mmol), and triethylamine (1.66 g, 16.4 mmol) were dissolved in 100 cm<sup>3</sup> of THF and stirred with cooling to 0 °C. To the solution was added DEPC (1.82 g, 11.2 mmol) and stirred in an ice bath for 30 min. After being stirred for 1 day at room temperature, the solution was concentrated *in vacuo*. The residue was dissolved in 200 cm<sup>3</sup> of chloroform and was washed with 0.3 N HCl (200 cm<sup>3</sup>, in twice), deionized water (20 cm<sup>3</sup>, once), 5 wt% aqueous NaHCO<sub>3</sub> (200 cm<sup>3</sup>, in twice), and deionized water (20 cm<sup>3</sup>, once). The solution was dried over Na<sub>2</sub>SO<sub>4</sub>. After filtration, the filtrate was concentrated *in vacuo* and recrystallized from methanol to give white solid **(12)**: yield 2.68 g (65.0 %); m.p. 166-169 °C; FT-IR (KBr): /cm<sup>-1</sup> 3300, 2922, 1690, 1638 and 1547; <sup>1</sup>H-NMR (CDCl<sub>3</sub>):  $\delta$  0.70-1.00 (t, 6H, CH<sub>3</sub> × 2), 1.00-1.71 (m, 40H, CH<sub>3</sub>(CH<sub>2</sub>)<sub>10</sub> × 2), 1.71-2.70 (m, 8H, \*CH(CH<sub>2</sub>)<sub>2</sub>, C(=O)(CH<sub>2</sub>)<sub>2</sub>CH<sub>2</sub>NH), 2.80-3.60 (m, 6H, CH<sub>2</sub>NH × 3), 3.88-4.61 (m, 1H, \*CH), 5.09 (s, 2H, CH<sub>2</sub>C<sub>6</sub>H<sub>5</sub>), 5.20 (br t, 1H, NH), 6.19 (br t, 1H, NH), 6.95 (br t, 2H, NH × 2), 7.34 (s, 5H, C<sub>6</sub>H<sub>5</sub>); (Found: C, 69.68; H, 10.09; N, 7.60. Calc. for C<sub>41</sub>H<sub>72</sub>N<sub>4</sub>O<sub>5</sub>·0.5H<sub>2</sub>O: C, 69.39; H, 10.16; N, 7.90 %). The related compound *N',N''*-didodecyl-N<sup>α</sup>-[6-(*N''''*-benzyloxycarbonyl)aminohexanoyl]-L-glutamide **(13)** was

prepared similarly using  $\epsilon$ -(*N*-benzyloxycarbonyl)aminohexanoic acid (**18**) instead of **17** to give white powder (**13**): yield 1.84 g (59 %); m.p. 140-149 °C; FT-IR (KBr): /cm<sup>-1</sup> 3300, 2922, 1690, 1636 and 1545; <sup>1</sup>H-NMR (CDCl<sub>3</sub>):  $\delta$  0.64-1.03 (t, 6H, CH<sub>3</sub> × 2), 1.03-2.67 (m, 52H, CH<sub>3</sub>(CH<sub>2</sub>)<sub>10</sub> × 2, \*CH(CH<sub>2</sub>)<sub>2</sub>, C(=O)(CH<sub>2</sub>)<sub>4</sub>NH), 2.67-3.55 (m, 6H, CH<sub>2</sub>NH × 3), 4.12-4.60 (m, 1H, \*CH), 5.00 (br t, 1H, NH), 5.09 (s, 2H, CH<sub>2</sub>C<sub>6</sub>H<sub>5</sub>), 6.37 (br s, 1H, NH), 6.95-7.23 (m, 2H, NH × 2), 7.34 (s, 5H, C<sub>6</sub>H<sub>5</sub>); (Found: C, 70.47; H, 10.36; N, 7.42. Calc. for C<sub>43</sub>H<sub>76</sub>N<sub>4</sub>O<sub>5</sub>·0.2H<sub>2</sub>O: C, 70.47; H, 10.51; N, 7.65 %).  $\epsilon$ -(*N*-Benzyloxycarbonyl)aminohexanoic acid (**18**): yield 19.08 g (93 %); m.p. 49-50 °C; FT-IR (KBr): /cm<sup>-1</sup> 3336, 2948, 1723, 1692 and 1535; <sup>1</sup>H-NMR (CDCl<sub>3</sub>):  $\delta$  0.85-1.99 (m, 6H, C(=O)CH<sub>2</sub>(CH<sub>2</sub>)<sub>3</sub>), 2.10-2.60 (t, 2H, C(=O)CH<sub>2</sub>), 2.72-3.54 (q, 2H, CH<sub>2</sub>NH), 4.90 (br s, 1H, NH), 5.09 (s, 2H, CH<sub>2</sub>C<sub>6</sub>H<sub>5</sub>), 6.89-7.70 (s, 5H, C<sub>6</sub>H<sub>5</sub>), 9.77 (br s, 1H, OH).

***N',N''*-Didodecyl-*N* <sup>$\alpha$</sup> -[3-(*N'''*-benzyloxycarbonyl)aminopropanoyl]-L-aspartamide (**14**)**. **14** was prepared by the coupling of *N',N''*-didodecyl-L-aspartamide<sup>1b</sup> and Ala-Z using DEPC and triethylamine as described above to give white solid: yield 2.31 g (80 %); m.p. 188-190 °C; FT-IR (KBr): /cm<sup>-1</sup> 3288, 2922, 2854, 1688, 1644 and 1541; <sup>1</sup>H-NMR (CDCl<sub>3</sub>):  $\delta$  0.71-1.01 (t, 6H, CH<sub>3</sub> × 2), 1.01-1.75 (m, 40H, CH<sub>3</sub>(CH<sub>2</sub>)<sub>10</sub> × 2), 2.30-2.62 (t, 4H, C(=O)CH<sub>2</sub>), 3.00-3.34 (m, 4H, CH<sub>3</sub>(CH<sub>2</sub>)<sub>10</sub>CH<sub>2</sub> × 2), 3.34-3.70 (m, 2H, CH<sub>2</sub>NHC(=O)O), 4.46-4.84 (m, 1H, \*CH), 5.10 (s, 2H, CH<sub>2</sub>C<sub>6</sub>H<sub>5</sub>), 5.48 (br t, 1H, NH), 6.17 (br t, 2H, NH × 2), 7.09-7.70 (m, 6H, C<sub>6</sub>H<sub>5</sub>, NH); (Found: C, 69.59; H, 10.25; N, 8.31. Calc. for C<sub>39</sub>H<sub>68</sub>N<sub>4</sub>O<sub>5</sub>: C, 69.60; H, 10.19; N, 7.33 %). The related compound *N',N''*-didodecyl-L-2-*N* <sup>$\alpha$</sup> -[3-(*N'''*-benzyloxycarbonyl)aminopropanoyl]-aminoadipamide (**15**) was prepared as described above using *N',N''*-didodecyl-L-2-aminoadipamide<sup>2</sup> instead of *N',N''*-didodecyl-L-aspartamide<sup>1b</sup> to give white solid: yield 2.69 g (73.7 %); m.p. 210-213 °C; FT-IR (KBr): /cm<sup>-1</sup> 3297, 2815, 1697, 1632 and 1594; <sup>1</sup>H-NMR (CDCl<sub>3</sub>):  $\delta$  0.79-0.94 (t, 6H, CH<sub>3</sub> × 2), 1.16-1.38 (m, 36H, CH<sub>3</sub>(CH<sub>2</sub>)<sub>9</sub> × 2), 1.38-1.88 (m, 8H, CH<sub>3</sub>(CH<sub>2</sub>)<sub>9</sub>CH<sub>2</sub> × 2, \*CH(CH<sub>2</sub>)<sub>2</sub>), 1.96-2.35 (m, 2H, \*CH(CH<sub>2</sub>)<sub>2</sub>CH<sub>2</sub>), 2.35-2.51 (m, 2H, C(=O)CH<sub>2</sub>CH<sub>2</sub>NH), 3.12-3.29 (m, 4H, CH<sub>3</sub>(CH<sub>2</sub>)<sub>10</sub>CH<sub>2</sub> × 2), 3.41-3.53 (q, 4H, CH<sub>2</sub>NHC(=O)O), 4.25-4.36 (m,

1H, \*CH), 5.03-5.15 (s, 2H, CH<sub>2</sub>C<sub>6</sub>H<sub>5</sub>), 5.55-5.65 (m, 1H, NH), 5.72-5.81 (m, 1H, NH), 6.75-6.83 (d, 1H, NH), 6.83-6.92 (m, 1H, NH), 7.29-7.41 (s, 5H, C<sub>6</sub>H<sub>5</sub>); (Found: C, 69.84; H, 10.11; N, 7.93. Calc. for C<sub>41</sub>H<sub>72</sub>N<sub>4</sub>O<sub>5</sub>·0.2H<sub>2</sub>O: C, 69.84; H, 10.36; N, 7.95 %). The related compound *N',N''*-dihexadecyl-*N*<sup>α</sup>-[3-(*N'''*-benzyloxycarbonyl)aminopropanoyl]-L-glutamide (**16**) was prepared as described above using *N',N''*-dihexadecyl-L-glutamide (**20**) derived from *N',N''*-dihexadecyl-*N*<sup>α</sup>-benzyloxycarbonyl-L-glutamide (**19**) instead of *N',N''*-didodecyl-L-glutamide.<sup>1</sup> **19**: white solid, yield 3.6 g (87%); m.p. 129.5 °C; FT-IR (KBr): /cm<sup>-1</sup> 3296, 2920, 2854, 1688, 1649 and 1560; <sup>1</sup>H-NMR (CDCl<sub>3</sub>): δ 0.70-1.03 (t, 6H, CH<sub>3</sub> × 2), 1.03-1.72 (m, 56H, CH<sub>3</sub>(CH<sub>2</sub>)<sub>14</sub> × 2), 1.72-2.63 (m, 4H, \*CH(CH<sub>2</sub>)<sub>2</sub>), 2.63-3.42 (m, 4H, CH<sub>2</sub>NH × 2), 4.03-4.40 (m, 1H, \*CH), 4.98-5.20 (s, 2H, CH<sub>2</sub>C<sub>6</sub>H<sub>5</sub>), 7.23-7.50 (s, 5H, C<sub>6</sub>H<sub>5</sub>). **20**: yield 6.5 g (95 %); m.p. 88-102 °C; FT-IR (KBr): /cm<sup>-1</sup> 3326, 2922, 2854, 1636 and 1533; <sup>1</sup>H-NMR (CDCl<sub>3</sub>): δ 0.70-1.01 (t, 6H, CH<sub>3</sub> × 2), 1.01-1.80 (m, 56H, CH<sub>3</sub>(CH<sub>2</sub>)<sub>14</sub> × 2), 1.80-2.20 (t, 2H, \*CHCH<sub>2</sub>), 2.20-2.54 (t, 2H, C(=O)CH<sub>2</sub>), 2.89 (br, 2H, NH<sub>2</sub>), 3.02-3.36 (m, 4H, CH<sub>2</sub>NH × 2), 3.68-4.70 (m, 1H, \*CH), 6.82 (br, 1H, NH), 7.41 (br, 1H, NH). **16**: yield 2.74g (68 %); m.p. 143 °C; FT-IR (KBr): /cm<sup>-1</sup> 3298, 2922, 2854, 1698, 1638 and 1543; <sup>1</sup>H-NMR (CDCl<sub>3</sub>): δ 0.68-1.03 (t, 6H, CH<sub>3</sub> × 2), 1.03-1.80 (m, 56H, CH<sub>3</sub>(CH<sub>2</sub>)<sub>14</sub> × 2), 1.80-2.17 (m, 2H, \*CHCH<sub>2</sub>), 2.17-2.74 (m, 4H, C(=O)CH<sub>2</sub> × 2), 2.97-3.36 (m, 4H, CH<sub>3</sub>(CH<sub>2</sub>)<sub>14</sub>CH<sub>2</sub> × 2), 3.36-3.78 (m, 2H, CH<sub>2</sub>NHC(=O)O), 4.20-4.59 (m, 1H, \*CH), 4.90-5.30 (s, 2H, CH<sub>2</sub>C<sub>6</sub>H<sub>5</sub>), 7.18-7.59 (s, 5H, C<sub>6</sub>H<sub>5</sub>). (Found: C, 71.37; H, 10.87; N, 6.54. Calc. for C<sub>48</sub>H<sub>86</sub>N<sub>4</sub>O<sub>5</sub>·0.5H<sub>2</sub>O: C, 71.37; H, 10.85; N, 6.94 %).

## References

- (a) H. Ihara, H. Hachisako, C. Hirayama and K. Yamada, *Liq. Cryst.*, 1987, 2, 215-221; (b) H. Hachisako, Y. Murata, and H. Ihara, *J. Chem. Soc., Perkin Trans. 2*, 1999, 2569-2577; (c) H. Hachisako, Y. Motozato, R. Murakami and K. Yamada, *Chem. Lett.*, 1992, 219-222.



- 2 Preceding paper: H. Hachisako, N. Ryu and R. Murakami, *Org. Biomol. Chem.*, 2008, submitted with this article (Paper ref.: B818206J).
