# Supplementary material for: Formation of specific dipolar microenvironments complementary to dipolar betaine dye by nonionic peptide lipids in nonpolar medium
Source: Royal Society of Chemistry journal article supplement (doi:10.1039/b818218c), 2009-01-01
Supplement: b818218c-b.pdf [file b818218c-b.pdf]

**Figure S1.** Hachisako et al.

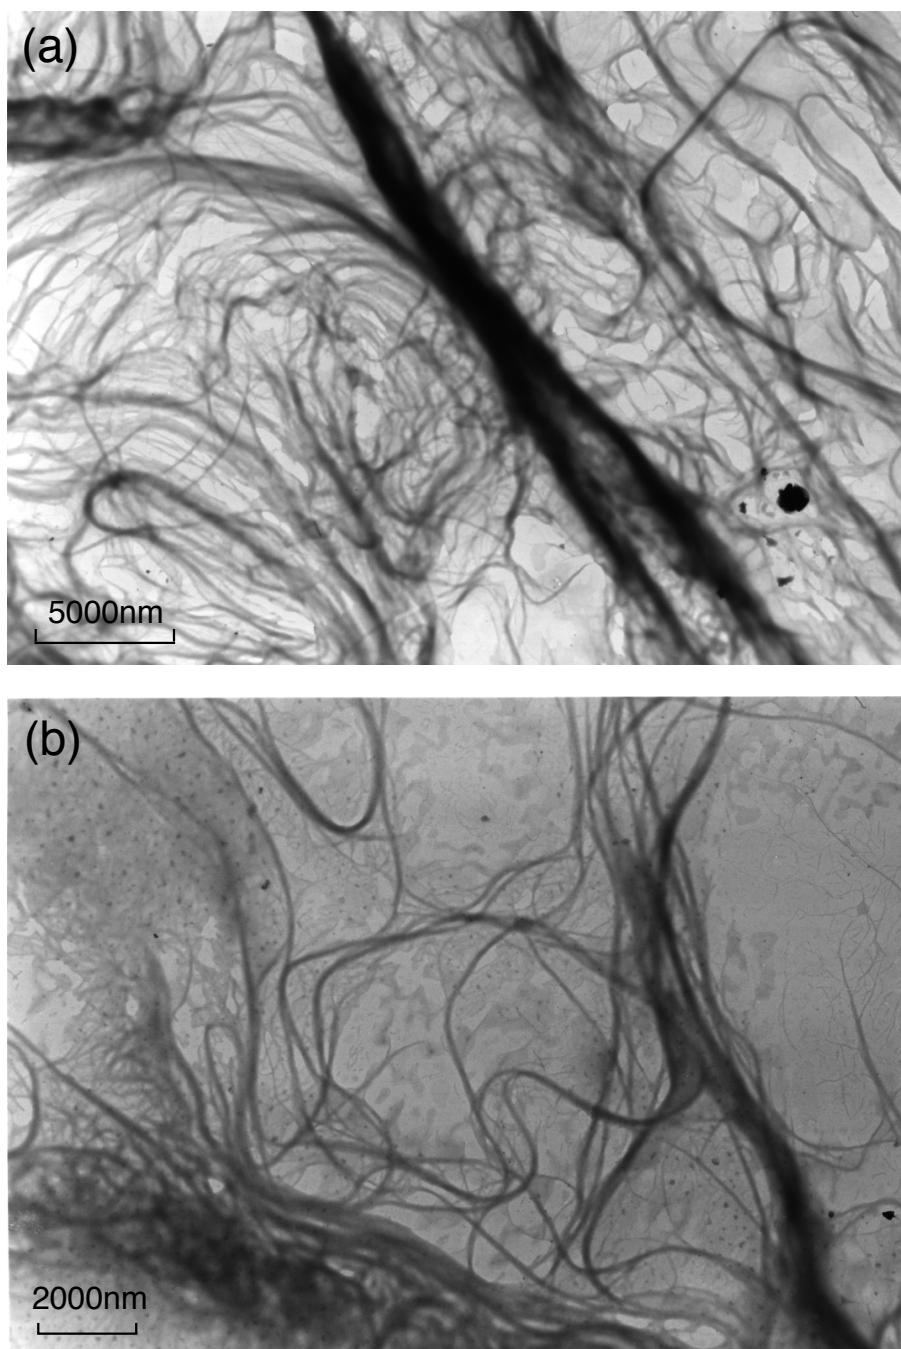

**Figure S1.** TEM images of xerogels obtained from organogels of (a) L-1 and (b) L-11 in chlorobenzene: post-stained with 2 wt% of aqueous ammonium molybdate: [L-1] = [L-11] = 1.0 mM.

**Figure S2.** Hachisako et al.

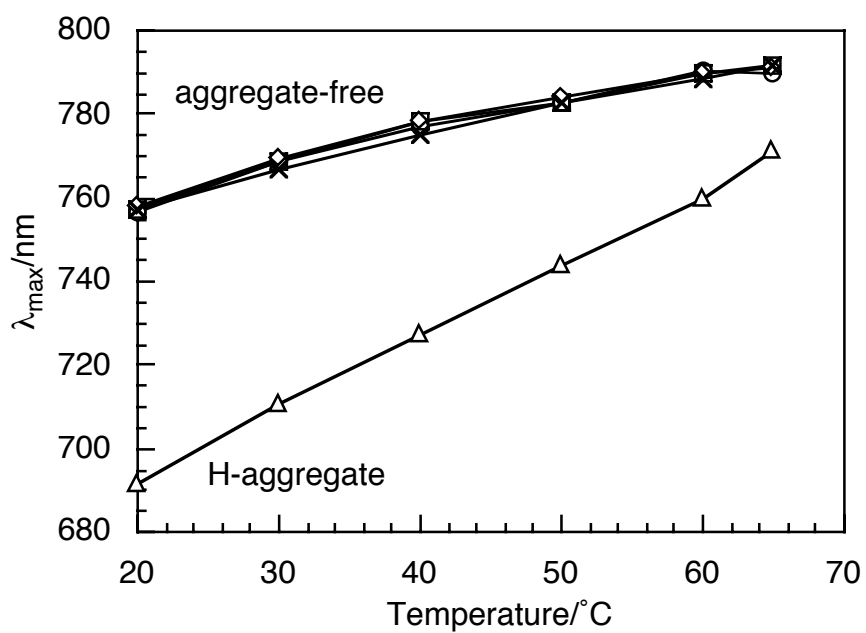

**Figure S2.** Concentration dependence of  $\lambda_{\text{max}}$  of ET(30) in chlorobenzene:  $\circ$ ; [ET(30)] = 0.0325 mM,  $\square$ ; [ET(30)] = 0.075 mM,  $\diamond$ ; [ET(30)] = 0.15 mM,  $\times$ ; [ET(30)] = 0.30 mM,  $\Delta$ ; [ET(30)]  $\sim$  1.5 mM (saturated solution).

**Figure S3.** Hachisako et al.

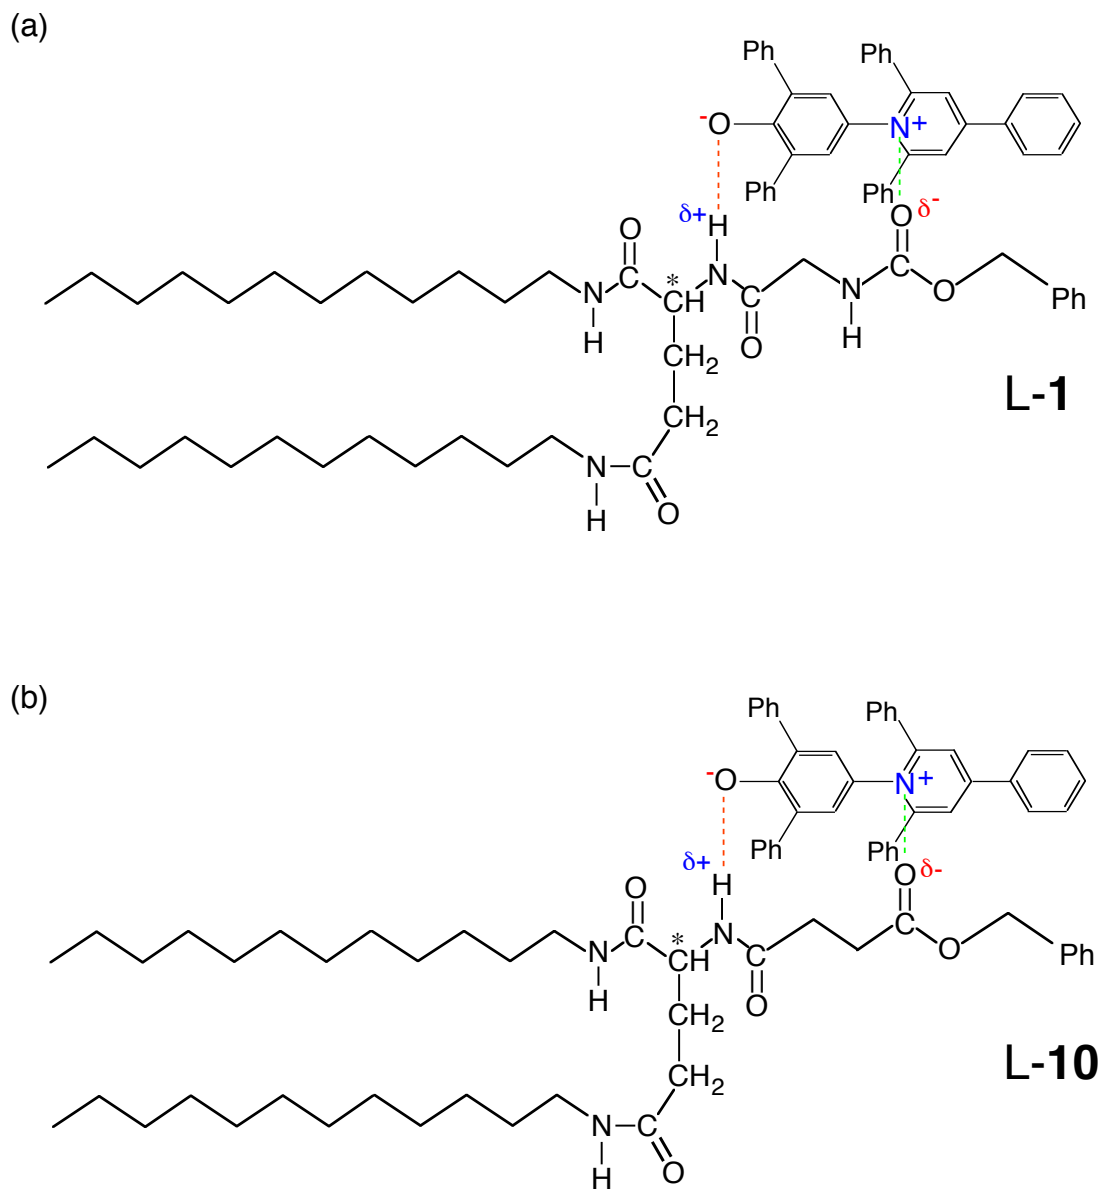

**Figure S3.** Schematic representation of intermolecular interactions between ET(30) and lipids L-1 (a) and L-10 (b), respectively, in chlorobenzene.

**Figure S4.** Hachisako et al.

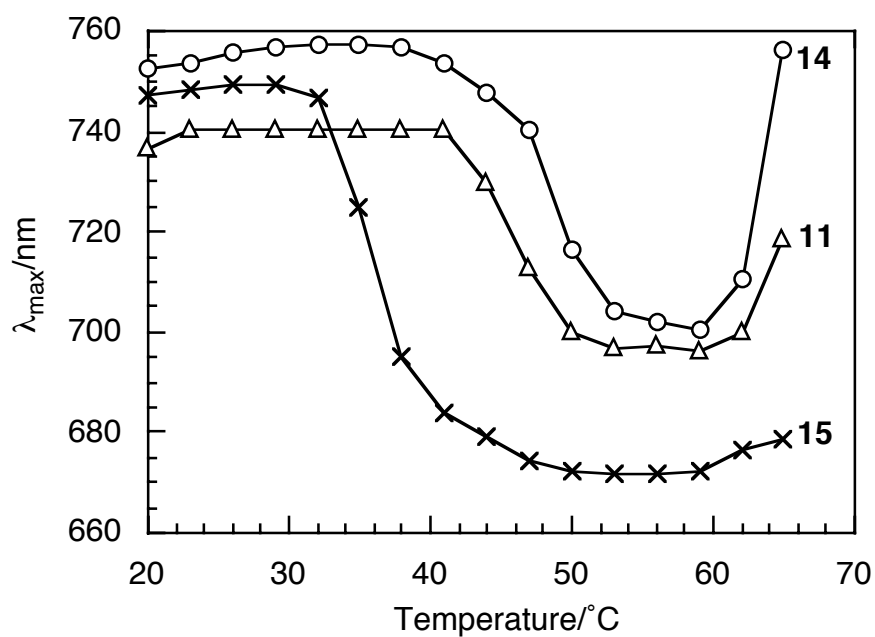

**Figure S4.** Temperature dependence of  $\lambda_{\max}$  of ET(30) in the presence of lipid aggregates of L-11, L-14, and L-15 in chlorobenzene.

**Figure S5.** Hachisako et al.

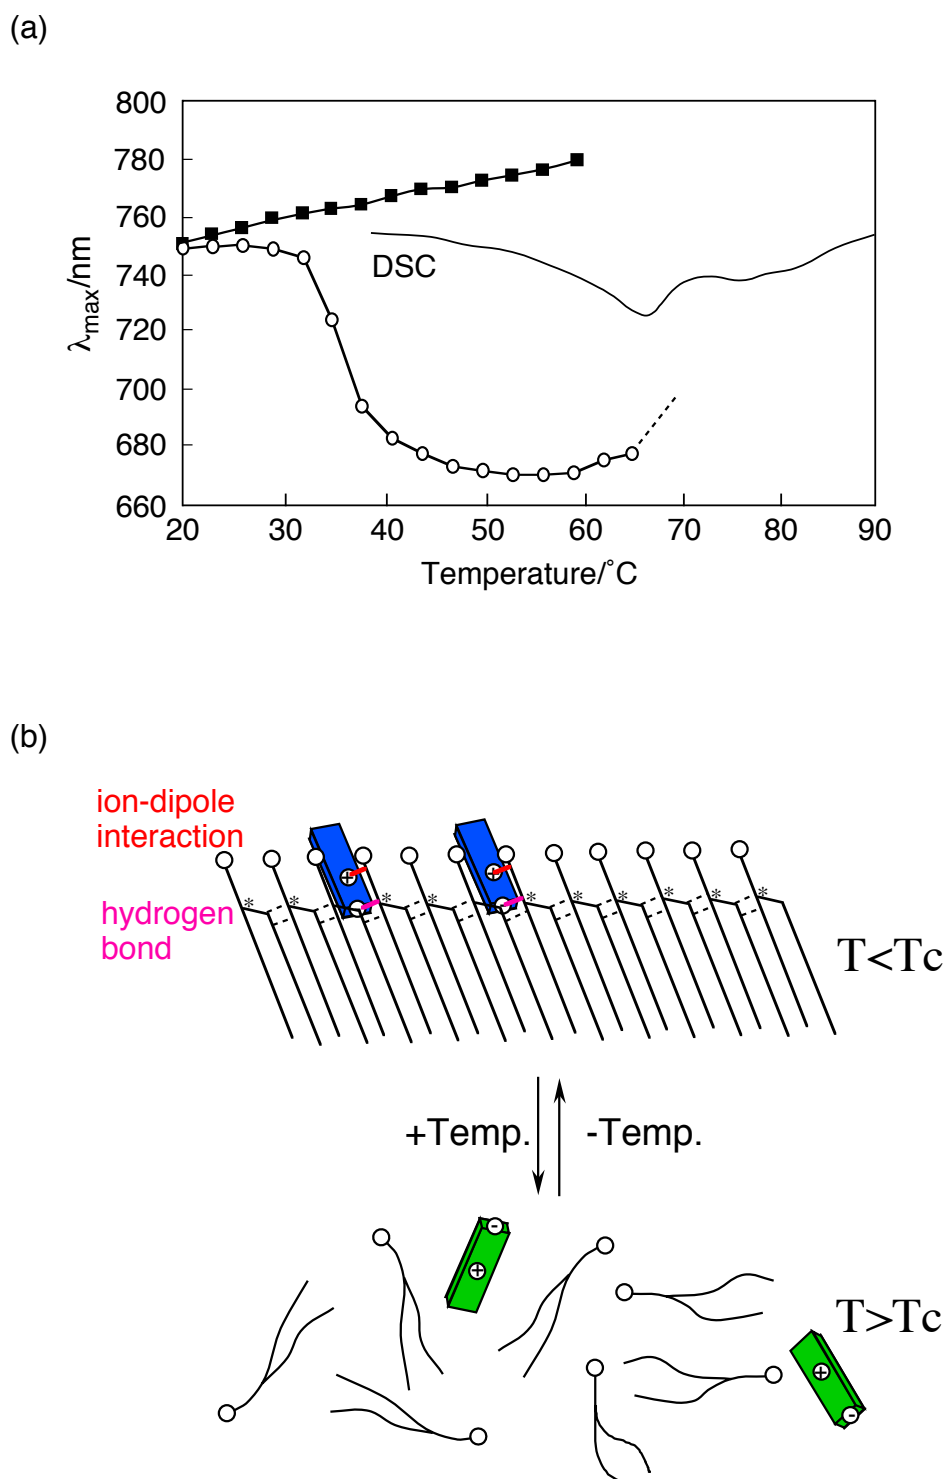

**Figure S5.** (a) Temperature dependence of  $\lambda_{\max}$  of ET(30) (■) alone and (○) in the presence of lipid aggregates of L-11 in chlorobenzene; (b) Schematic representation of interaction between lipid (L-1, L-7, L-8, L-9, L-11, DL-11, L-14, L-15, or L-16) and ET(30) in chlorobenzene. Bilayer structure is omitted for clarity.

**Figure S6.** Hachisako et al.

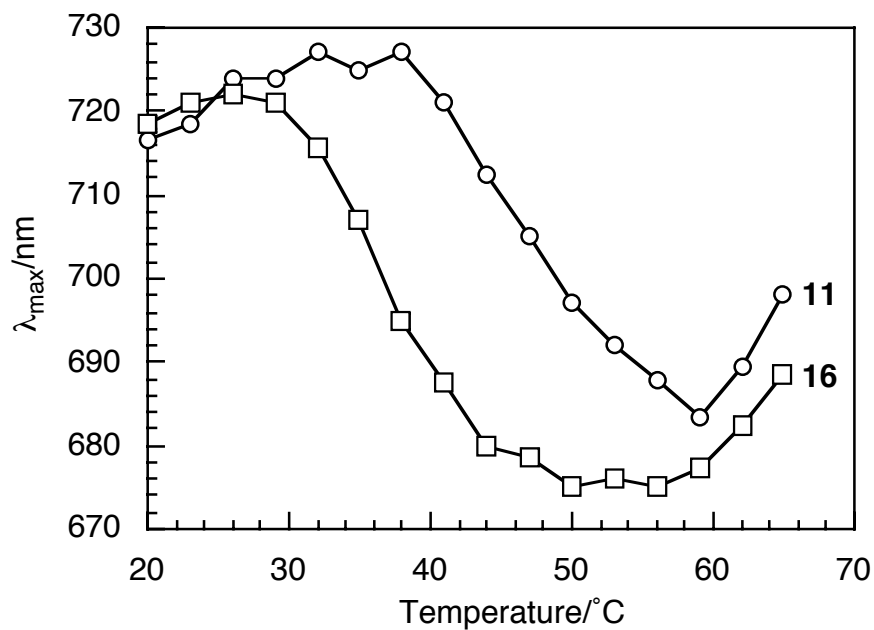

**Figure S6.** Temperature dependence of  $\lambda_{\max}$  of ET(30) in the presence of lipids L-11 and L-16 in chlorobenzene: O; L-11, □; L-16, [lipid] = 3.0 mM, [ET(30)] = 0.15 mM, [lipid]/[ET(30)] = 20.
